# Supplementary material for: Locomotor hyperactivity in 14-3-3ζ KO mice is associated with dopamine transporter dysfunction
Source: PubMed Central journal article supplement — Transl Psychiatry. 2013 Dec 3;3(12):e327–. doi: 10.1038/tp.2013.99 (PMC4030331; doi:10.1038/tp.2013.99), 2013-12-03
Supplement: tp201399x1.pdf [file tp201399x1.pdf]

Supplementary Information

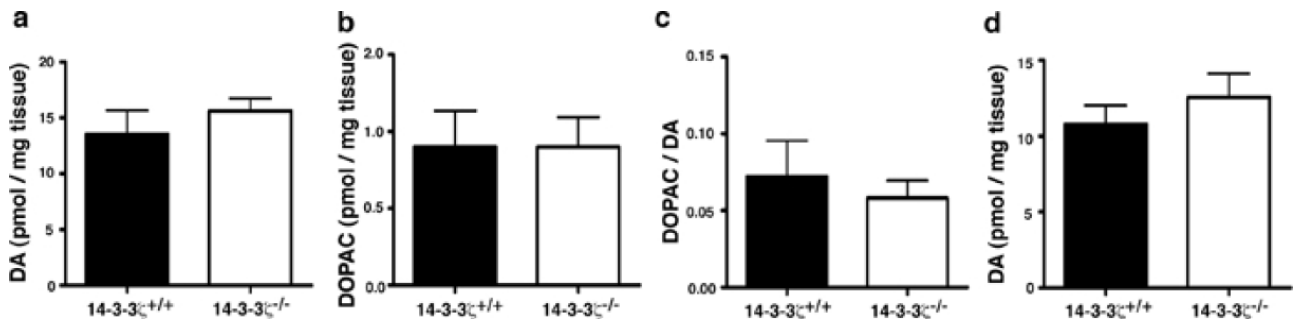

**Supplementary Figure S1. Baseline levels of dopamine and DOPAC in 14-3-3 $\zeta$  KO mice.**

Baseline DA and DOPAC levels were measured in the cortex (a-c) and hippocampus (d) by HPLC/EC. (a) 14-3-3 $\zeta$  KO mice (white bar; n=6; 4 male and 2 female) have slightly increased DA compared to 14-3-3 $\zeta$  WT mice (closed bar; n=6; 3 male and 3 female) in the cortex. (b) DOPAC levels are similar between 14-3-3 $\zeta$  KO mice (white bar) and 14-3-3 $\zeta$  WT mice (closed bar) in the cortex. Dopamine turnover (DOPAC / DA ratio) is reduced in 14-3-3 $\zeta$  KO mice (white bar) compared to 14-3-3 $\zeta$  WT mice (closed bar). (d) 14-3-3 $\zeta$  KO mice (white bar; n=6; 4 male and 2 female) have slightly increased DA compared to 14-3-3 $\zeta$  WT mice (closed bar; n=6; 3 male and 3 female) in the hippocampus. No DOPAC was detected in the hippocampus using HPLC/EC.

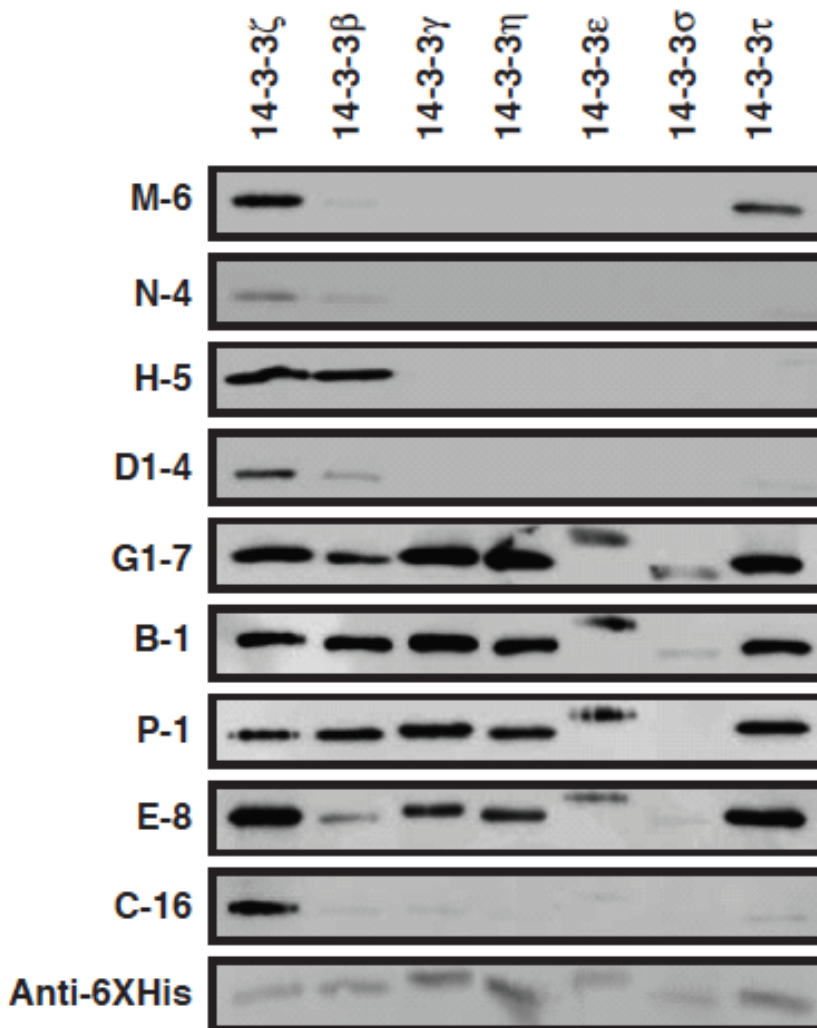

**Supplementary Figure S2. Isoform specificity of 14-3-3 $\zeta$  monoclonal antibodies.** His tagged 14-3-3 isoforms were expressed in bacteria. Monoclonal 14-3-3 $\zeta$  antibodies (M-6, N-4, H-5, D1-4, G1-7, B-1, P-1 and E-8) were used for western blot analysis in comparison to the anti-14-3-3 $\zeta$  C-16 antibody (Santa Cruz). Anti-6XHis was used as a loading control.

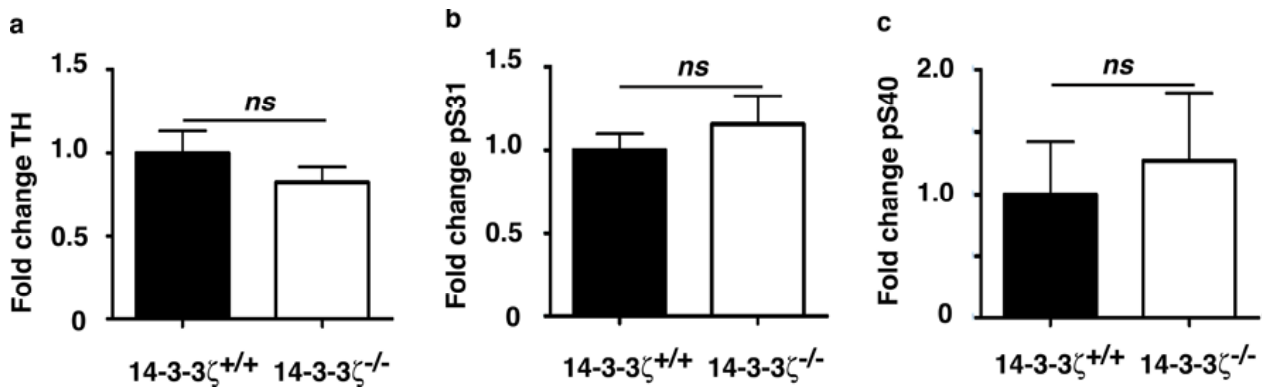

**Supplementary Figure S3. Normal expression of TH in 14-3-3 $\zeta$  KO mice.** (a) Quantitation of anti-TH western blot normalised to anti-Alpha tubulin confirms that 14-3-3 $\zeta$  KO (open bar) mice have similar levels of TH compared to WT mice (closed bar). (b) Quantitation of anti-phospho Ser-31 TH western blot normalised to anti-Alpha tubulin confirms that 14-3-3 $\zeta$  KO (open bar) mice have similar levels of phospho Ser-31 TH compared to WT mice (closed bar). (c) Quantitation of anti-phospho Ser-40 TH western blot normalised to anti-Alpha tubulin confirms that 14-3-3 $\zeta$  KO (open bar) mice have similar levels of phospho Ser-40 TH compared to WT mice (closed bar).

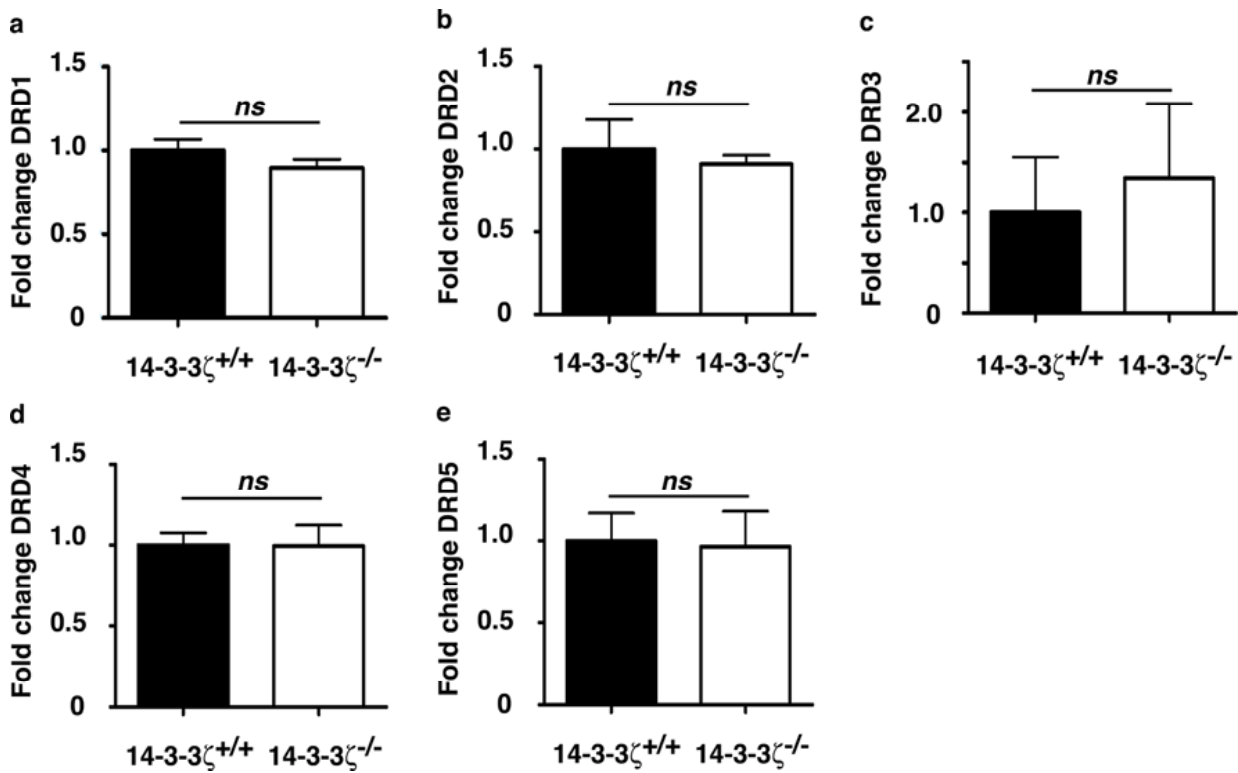

**Supplementary Figure S4. Normal expression of DA receptors in 14-3-3 $\zeta$  KO mice.**

Quantitation of anti-DA receptors D1-D5 western blot normalised to anti-Alpha tubulin confirms that 14-3-3 $\zeta$  KO (open bars) mice have similar levels of DA receptors compared to WT mice (closed bars).

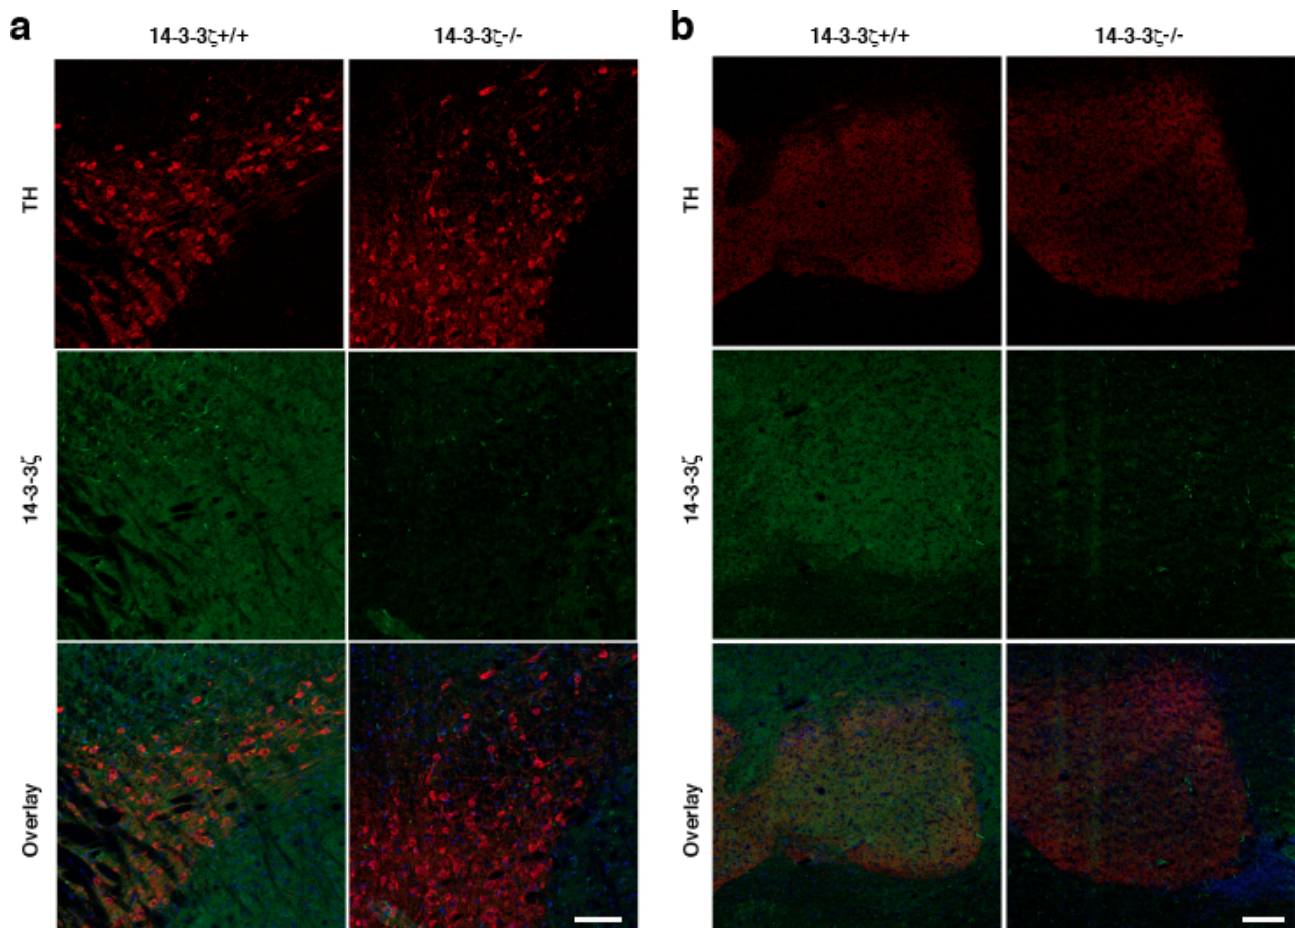

**Supplementary Figure S5. Expression of 14-3-3 $\zeta$  in dopaminergic neurons.** (a) Sagittal brain sections stained with anti-TH (red) and anti-14-3-3 $\zeta$  M-6 (green) show 14-3-3 $\zeta$  expression in the VTA / SN of 14-3-3 $\zeta$  WT mice. Staining was not observed in 14-3-3 $\zeta$  KO sections. Scale bar = 100 $\mu$ m. (b) 14-3-3 $\zeta$  is also expressed in dopaminergic terminals in the striatum. Scale bar = 200 $\mu$ m.

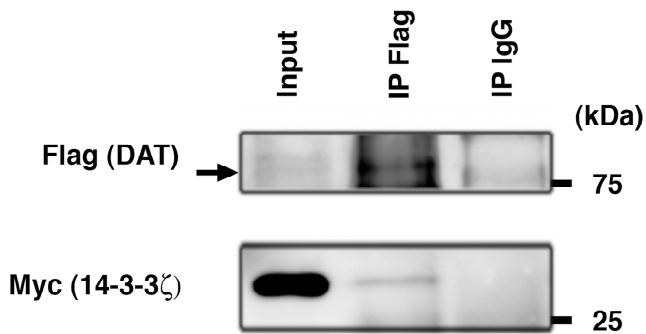

**Supplementary Figure S6. 14-3-3 $\zeta$  associates with DAT.** SN4741 cells were transiently transfected with Flag-His-DAT and Myc-14-3-3 $\zeta$ . DAT was precipitated from protein lysates with anti-Flag antibody and anti mouse IgG control antibodies. Immunoprecipitates were probed with anti-Myc monoclonal antibody to recognise 14-3-3 $\zeta$  and anti-Flag to recognise DAT. Note that 14-3-3 $\zeta$  and DAT are present in the input and Flag (DAT) immunoprecipitation (IP; arrow) but not in the control IgG IP.
